# Supplementary material
Source: ML conference proceedings conference paper supplement (https://proceedings.mlr.press/v37/beygelzimer15.html)
Supplement: Supplementary file [file beygelzimer15-supp.pdf]

---

## Optimal and Adaptive Algorithms for Online Boosting Supplementary Material

---

### A. Proof of Lemma 1

*Proof.* Fix a weak learner, say  $WL^i$ . Let

$$U = \{t : (\mathbf{x}_t, y_t) \text{ passed to } WL^i\}.$$

Since inequality (1) holds even for *adaptive* adversaries, with high probability we have

$$\sum_{t=1}^T \mathbf{1}\{WL^i(\mathbf{x}_t) \neq y_t\} \mathbf{1}\{t \in U\} \leq (\frac{1}{2} - \gamma)|U| + S. \quad (1)$$

Now fix the internal randomness of  $WL^i$ . Note that  $\mathbb{E}_t[\mathbf{1}\{t \in U\}] = p_t^i = \frac{w_t^i}{\|\mathbf{w}^i\|_\infty}$ , where  $\mathbb{E}_t[\cdot]$  is the expectation conditioned on all the randomness of the booster until (and not including) round  $t$ . Define  $\sigma = \sum_{t=1}^T p_t^i$ .

We now show using martingale concentration bounds that with high probability,

$$\begin{aligned} & \sum_{t=1}^T \mathbf{1}\{WL^i(\mathbf{x}_t) \neq y_t\} p_t^i \\ & \leq \sum_{t=1}^T \mathbf{1}\{WL^i(\mathbf{x}_t) \neq y_t\} \mathbf{1}\{t \in U\} + \tilde{O}(\sqrt{\sigma}) \end{aligned} \quad (2)$$

and

$$|U| \leq \sigma + \tilde{O}(\sqrt{\sigma}). \quad (3)$$

Here, the  $\tilde{O}(\cdot)$  notation suppresses dependence on  $\log \log(T)$ .

To prove inequality (2), consider the martingale difference sequence

$$X_t = \mathbf{1}\{WL^i(\mathbf{x}_t) \neq y_t\} \mathbf{1}\{t \in U\} - \mathbf{1}\{WL^i(\mathbf{x}_t) \neq y_t\} p_t^i.$$

Note that  $|X_t| \leq 1$ , and the conditional variance satisfies

$$\text{Var}_t[X_t | X_1, X_2, \dots, X_{t-1}] \leq p_t^i.$$

Then, by Lemma 2 of Bartlett et al. (2008), for any  $\delta < 1/e$  and assuming  $T \geq 4$ , with probability at least  $1 - \log_2(T)\delta$ , we have

$$\sum_{t=1}^T X_t \leq 2 \max \left\{ 2\sqrt{\sigma}, \sqrt{\ln(\frac{1}{\delta})} \right\} \sqrt{\ln(\frac{1}{\delta})} = \tilde{O}(\sqrt{\sigma}),$$

by choosing  $\delta \ll \frac{1}{\log_2(T)}$ . This implies inequality (2). Inequality (3) is proved similarly. Note that these high probability bounds are conditioned on the internal randomness of  $WL^i$ . By taking an expectation of this conditional probability over the internal randomness of  $WL^i$ , we conclude that inequalities (2) and (3) hold with high probability unconditionally.

Via a union bound, inequalities (1), (2) and (3) all hold simultaneously with high probability, which implies that

$$\sum_{t=1}^T \mathbf{1}\{WL^i(\mathbf{x}_t) \neq y_t\} p_t^i \leq (\frac{1}{2} - \gamma)\sigma + S + \tilde{O}(\sqrt{\sigma}). \quad (4)$$

Using the facts that  $p_t^i = \frac{w_t^i}{\|\mathbf{w}^i\|_\infty}$  and  $\mathbf{1}\{WL^i(\mathbf{x}_t) \neq y_t\} = \frac{1-z_t^i}{2}$  and simplifying, we get

$$\begin{aligned} \mathbf{w}^i \cdot \mathbf{z}^i & \geq 2\gamma \|\mathbf{w}^i\|_1 - 2S \|\mathbf{w}^i\|_\infty - \tilde{O}(\sqrt{\|\mathbf{w}^i\|_1 \|\mathbf{w}^i\|_\infty}) \\ & \geq 2\gamma \|\mathbf{w}^i\|_1 - 2S \|\mathbf{w}^i\|_\infty - \gamma \|\mathbf{w}^i\|_1 - \tilde{O}(\frac{\|\mathbf{w}^i\|_\infty}{\gamma}) \\ & = \gamma \|\mathbf{w}^i\|_1 - 2S \|\mathbf{w}^i\|_\infty - \tilde{O}(\frac{\|\mathbf{w}^i\|_\infty}{\gamma}). \end{aligned}$$

The second inequality above follows from the arithmetic mean-geometric mean inequality. This gives us the desired bound. The high probability bound for all weak learners follows by taking a union bound.  $\square$

### B. Proof of Lemma 4

*Proof.* Let  $X \sim B(m, p)$  be a binomial random variable where  $m = N - i$  and  $p = 1/2 + \gamma/2$ . Also let  $q = 1 - p$  and  $F_X$  be the CDF of  $X$ . By the definition of  $w_t^i$ , we have  $w_t^i \leq \frac{1}{2} \max_k \Pr\{X = k\}$ . We will approximate  $X$  by a Gaussian random variable  $G \sim N(mp, mpq)$  with density function  $f$  and CDF  $F_G$ . Note that

$$\begin{aligned} & \left| \Pr\{X = k\} - \int_{k-1}^k f(G) dG \right| \\ & = |(F_X(k) - F_X(k-1)) - (F_G(k) - F_G(k-1))| \\ & \leq |F_X(k) - F_G(k)| + |F_X(k-1) - F_G(k-1)|. \end{aligned}$$

So by applying the Berry-Esseen theorem to the above two CDF differences between  $X$  and  $G$ , we arrive at

$$\left| \Pr\{X = k\} - \int_{k-1}^k f(G) dG \right| \leq \frac{2C(p^2 + q^2)}{\sqrt{mpq}},$$

where  $C$  is the universal constant stated in the Berry-Esseen theorem. It remains to point out that

$$\begin{aligned} \Pr\{X = k\} &\leq \int_{k-1}^k f(G)dG + \frac{2C(p^2 + q^2)}{\sqrt{mpq}} \\ &\leq \max_{G \in \mathbb{R}} f(G) + \frac{2C(p^2 + q^2)}{\sqrt{mpq}} \\ &= \frac{1}{\sqrt{2\pi mpq}} + \frac{2C(p^2 + q^2)}{\sqrt{mpq}} = O\left(\frac{1}{\sqrt{m}}\right), \end{aligned}$$

since  $pq = 1/4 - \gamma^2/4 \geq 3/16$ .  $\square$

### C. Proof of Theorem 3

*Proof.* The proof of both lower bounds use a similar construction. In either case, all examples' labels are generated uniformly at random from  $\{-1, 1\}$ , and in time period  $t$ , each weak learner outputs the correct label  $y_t$  independently of all other weak learners and other examples with a certain probability  $p_t$  to be specified later. Thus, for any  $T$ , by the Azuma-Hoeffding inequality, with probability at least  $1 - \delta$ , the predictions  $\hat{y}_t$  made by the weak learner satisfy

$$\begin{aligned} \sum_{t=1}^T \mathbf{1}\{y_t \neq \hat{y}_t\} &\leq \sum_{t=1}^T (1 - p_t) + \sqrt{2T \ln(\frac{1}{\delta})} \\ &\leq \sum_{t=1}^T (1 - p_t) + \gamma T + \frac{\ln(\frac{1}{\delta})}{2\gamma} \quad (5) \end{aligned}$$

where the last inequality follows by the arithmetic mean-geometric mean inequality. We will now carefully choose  $p_t$  so that inequality (5) implies inequality (1).

For the lower bound on the number of weak learners, we set  $p_t = \frac{1}{2} + 2\gamma$ , so that inequality (5) implies that with probability at least  $1 - \delta$ , the predictions  $\hat{y}_t$  made by the weak learner satisfy

$$\sum_{t=1}^T \mathbf{1}\{y_t \neq \hat{y}_t\} \leq (\frac{1}{2} - \gamma)T + \frac{\ln(\frac{1}{\delta})}{2\gamma} \leq (\frac{1}{2} - \gamma)T + S.$$

Thus, the weak online learner has edge  $\gamma$  with excess loss  $S$ . In this case, the Bayes optimal output of a booster using  $N$  weak learners is to simply take a majority vote of all the weak learners (see for instance [Schapire & Freund, 2012](#), Chap. 13.2.6), and the probability that the majority vote is incorrect is  $\Theta(\exp(-8N\gamma^2))$ . Setting this error to  $\epsilon$  and solving for  $N$  gives the desired lower bound.

Now we turn to the lower bound on the sample complexity. We divide the whole process into two phases: for  $t \leq T_0 = \frac{S}{4\gamma}$ , we set  $p_t = \frac{1}{2}$ , and for  $t > T_0$ , we set  $p_t = \frac{1}{2} + 2\gamma$ . Now, if  $T \leq T_0$ , inequality (5) implies that with probability

at least  $1 - \delta$ , the predictions  $\hat{y}_t$  made by the weak learner satisfy

$$\sum_{t=1}^T \mathbf{1}\{y_t \neq \hat{y}_t\} \leq (\frac{1}{2} + \gamma)T + \frac{\ln(\frac{1}{\delta})}{2\gamma} \leq (\frac{1}{2} - \gamma)T + S \quad (6)$$

using the fact that  $T \leq T_0 = \frac{S}{4\gamma}$  and  $S \geq \frac{\ln(\frac{1}{\delta})}{\gamma}$ . Next, if  $T > T_0$ , let  $T' = T - T_0$ , and again inequality (5) implies that with probability at least  $1 - \delta$ , the predictions  $\hat{y}_t$  made by the weak learner satisfy

$$\begin{aligned} \sum_{t=1}^T \mathbf{1}\{y_t \neq \hat{y}_t\} &\leq \frac{1}{2}T_0 + (\frac{1}{2} - 2\gamma)T' + \gamma T + \frac{\ln(\frac{1}{\delta})}{2\gamma} \\ &= (\frac{1}{2} - \gamma)T + 2\gamma T_0 + \frac{\ln(\frac{1}{\delta})}{2\gamma} \leq (\frac{1}{2} - \gamma)T + S, \quad (7) \end{aligned}$$

since  $S \geq \frac{\ln(\frac{1}{\delta})}{\gamma}$ . Inequalities (6) and (7) imply that the weak online learner has edge  $\gamma$  with excess loss  $S$ .

However, in the first phase (i.e.  $t \leq T_0$ ), since the predictions of the weak learners are uncorrelated with the true labels, it is clear that no matter what the booster does, it makes a mistake with probability  $\frac{1}{2}$ . Thus, it will make  $\Omega(T_0)$  mistakes with high probability in the first phase, and thus to achieve  $\epsilon$  error rate, it needs at least  $\Omega(T_0/\epsilon) = \Omega(\frac{S}{\epsilon\gamma})$  examples.  $\square$

### D. Proof of Lemma 5

*Proof.* It suffice to prove the bound for  $\sigma \geq \frac{1}{2}$ ; the bound for  $\sigma < \frac{1}{2}$  follows by symmetry simply changing the sign of  $\alpha$ . For  $\sigma \in [0.5, 0.95]$ , setting  $\alpha = \frac{1}{2} \ln(\frac{\sigma}{1-\sigma}) \in [-2, 2]$  gives

$$\sigma e^{-\alpha} + (1 - \sigma)e^{\alpha} = \sqrt{4\sigma(1 - \sigma)} \leq 1 - \frac{1}{2}(2\sigma - 1)^2,$$

since  $\sqrt{1 - x} \leq 1 - \frac{1}{2}x$  for  $x \in [0, 1]$ . For  $\sigma \in (0.95, 1]$ , setting  $\alpha = \frac{1}{2} \ln(\frac{0.95}{0.05}) \in [-2, 2]$  we have

$$\begin{aligned} \sigma e^{-\alpha} + (1 - \sigma)e^{\alpha} &\leq 0.95e^{-\alpha} + 0.05e^{\alpha} = \sqrt{0.19} \\ &\leq \frac{1}{2} \leq 1 - \frac{1}{2}(2\sigma - 1)^2. \end{aligned}$$

$\square$

### E. Description of Data Sets

The datasets come from the UCI repository, KDD Cup challenges, and the HCRC Map Task Corpus. Below,  $d$  is the number of unique features in the dataset, and  $s$  is the average number of features per example.

| Dataset      | instances | $s$  | $d$     |
|--------------|-----------|------|---------|
| 20news       | 18,845    | 93.9 | 101,631 |
| a9a          | 48,841    | 13.9 | 123     |
| activity     | 165,632   | 18.5 | 20      |
| adult        | 48,842    | 12.0 | 105     |
| bio          | 145,750   | 73.4 | 74      |
| census       | 299,284   | 32.0 | 401     |
| covtype      | 581,011   | 11.9 | 54      |
| letter       | 20,000    | 15.6 | 16      |
| maptaskcoref | 158,546   | 40.4 | 5,944   |
| nomao        | 34,465    | 82.3 | 174     |
| poker        | 946,799   | 10.0 | 10      |
| rcv1         | 781,265   | 75.7 | 43,001  |
| vehv2binary  | 299,254   | 48.6 | 105     |

## References

- Bartlett, Peter L., Dani, Varsha, Hayes, Thomas, Kakade, Sham, Rakhlin, Alexander, and Tewari, Ambuj. High-probability regret bounds for bandit online linear optimization. In *Proceedings of the 21st Annual Conference on Learning Theory (COLT 2008)*, pp. 335–342, 2008.
- Schapire, Robert E. and Freund, Yoav. *Boosting: Foundations and Algorithms*. MIT Press, 2012.
